# Supplementary material
Source: PubMed Central journal article supplement (PMC10282468)
Supplement: S1368980013001729sup001.pdf [file S1368980013001729sup001.pdf]

## Dietary Screening Tool<sup>1</sup>

**How often do you usually eat fruit as a snack?**

- 0 Never
- 2 Less than once a week
- 4 1 or 2 times a week
- 5 3 or more times a week

**How often do you usually eat whole grain breads?**

- 0 Never or less than once a week
- 3 1 or 2 times a week
- 5 3 or more times a week

**How often do you usually eat whole grain cereals?**

- 0 Never or less than once a week
- 3 1 or 2 times a week
- 5 3 or more times a week

**How often do you usually eat candy or chocolate?**

- 4 Never
- 3 Less than once a week
- 2 1 or 2 times a week
- 0 3 or more times a week

**How often do you eat crackers, pretzels, chips, or popcorn?**

- 4 Never
- 3 Less than once a week
- 2 1 or 2 times a week
- 0 3 or more times a week

**How often do you eat cakes or pies?**

- 4 Never
- 3 Less than once a week
- 2 1 or 2 times a week
- 0 3 or more times a week

**How often do you eat cookies?**

- 4 Never
- 3 Less than once a week
- 2 1 or 2 times a week
- 0 3 or more times a week

**How often do you eat ice cream?**

- 4 Never
- 3 Less than once a week
- 2 1 or 2 times a week
- 0 3 or more times a week

**How often do you eat cold cuts, hot dogs, lunchmeats or deli meats?**

- 5 Never or less than once a week
- 3 1 or 2 times a week
- 0 3 or more times a week

**How often do you eat bacon or sausage?**

- 5 Never or less than once a week
- 3 1 or 2 times a week
- 0 3 or more times a week

**How often do you eat carrots, sweet potatoes, broccoli, or spinach?**

- 0 Never
- 2 Less than once a week
- 6 1 or 2 times a week
- 8 3 or more times a week

**How often do you eat fruit (not including juice)? Please include fresh, canned or frozen fruit.**

- 0 Never or Less than once a week
- 2 1 or 2 times a week
- 4 3 to 5 times a week
- 5 Every day or almost every day

**How often do you eat hot or cold breakfast cereal?**

- 0 Never
- 1 Less than once a week
- 3 1 or 2 times a week
- 4 3 to 5 times a week
- 5 Every day or almost every day

**How often do you drink some kind of juice at breakfast?**

- 0 Never or Less than once a week
- 2 1 or 2 times a week
- 4 3 to 5 times a week
- 5 Every day or almost every day

**How often do you eat chicken or turkey?**

- 0 Never or less than once a week
- 3 1 or 2 times a week
- 5 More than 3 times a week

**How often do you drink a glass of milk?**

- 0 Never or Less than once a week
- 1 1 or 2 times a week
- 3 3 to 5 times a week
- 4 Every day or almost every day
- 5 More than once every day

**Do you usually add butter or margarine to foods like bread, rolls, or biscuits?**

- 0 Yes
- 1 No

**Do you usually add fat (butter, margarine or oil) to potatoes and other vegetables?**

- 0 Yes
- 1 No

**Do you use gravy (when available) at meals?**

- 0 Yes
- 1 No

**Do you usually add sugar or honey to sweeten your coffee or tea?**

- 0 Yes
- 1 No

**Do you usually drink wine, beer or other alcoholic beverages?**

- 0 Yes
- 1 No

**How often do you eat fish or seafood that IS NOT fried?**

- 0 Never
- 1 Less than once a week
- 3 Once a week
- 5 More than once a week

**How many servings of milk, cheese, or yogurt do you usually have each DAY?**

- 0** None
- 3** One
- 5** Two or more

**How many different vegetable servings do you usually have at your main meal of the day?**

- 0** None
- 1** One
- 5** Two
- 7** Three or more

**Which of the following best describes your nutritional supplement use.**

- 0** I don't use supplements
- 0** I use supplements other than vitamins and mineral
- 5** I use a multivitamin/mineral preparation (e.g. Centrum)

<sup>1</sup> The bolded score values were not presented on the DST when it was completed by the participants.
